# Supplementary material for: Experimental and first-principles DFT study on the electrochemical reactivity of garnet-type solid electrolytes with carbon
Source: Royal Society of Chemistry journal article supplement (doi:10.1039/c6ta04280e), 2016-01-01
Supplement: c6ta04280e1.pdf [file c6ta04280e1.pdf]

Supplementary Information

**Experimental and First-Principles DFT Study on the Electrochemical Reactivity of Garnet-Type Solid Electrolytes with Carbon**

R. Jalem,<sup>a,b</sup> Y. Morishita,<sup>b</sup> T. Okajima,<sup>b</sup> H. Takeda,<sup>b</sup> Y. Kondo,<sup>b</sup> M. Nakayama<sup>a,b,c,d,\*</sup> and T. Kasuga<sup>e</sup>

<sup>a</sup>National Institute for Materials Science (NIMS), Global Research Center for Environment and Energy based on Nanomaterials Science (GREEN), Namiki 1-1, Tsukuba, Ibaraki, 305-0044, Japan.

<sup>b</sup>Department of Materials Science and Engineering, Nagoya Institute of Technology, Gokiso, Showa, Nagoya, Aichi 466-8555, Japan. E-mail: nakayama.masanobu@nitech.ac.jp, TEL: +81 (0)52 735 5189, FAX: +81 (0)52 735 5189

<sup>c</sup>Unit of Elements Strategy Initiative for Catalysts & Batteries (ESICB), Kyoto University, Katsura, Saikyo-ku, Kyoto, 615-8520, Japan.

<sup>d</sup>Japan Science and Technology Agency, PRESTO, 4-1-8 Honcho Kawaguchi, Saitama 332-0012, Japan.

<sup>e</sup>Department of Frontier Materials, Nagoya Institute of Technology, Gokiso, Showa, Nagoya, Aichi 466-8555, Japan.

<sup>†</sup>Additional affiliation (First Author, Corresponding Author): National Institute for Materials Science (NIMS) - "Materials Research by Information Integration" Initiative (MI2I)

\*Corresponding author email: nakayama.masanobu@nitech.ac.jp

|                                                                                                                   | Page |
|-------------------------------------------------------------------------------------------------------------------|------|
| Figure S1. SEM image taken at the LFP+C - LLZrTaO interface.                                                      | S2   |
| Figure S2. Figure. Cycle characteristics for the Li/LLZrTaO/(LFP+C) cell at various cutoff voltage (0.05 C rate). | S2   |
| Figure S3. Figure. Cyclic voltammogram of a Li/LLZrTaO/Au cell                                                    | S2   |
| Figure S4. FTIR spectra for a) fresh LLZrTaO and b) Li <sub>2</sub> CO <sub>3</sub> .                             | S3   |
| Table S1. DFT-calculated decomposition potential of various non-carbon-related reactions.                         | S3   |

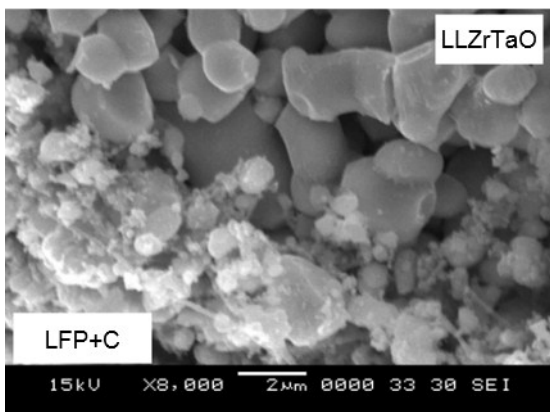

Figure S1. SEM image taken at the LFP+C - LLZrTaO interface.

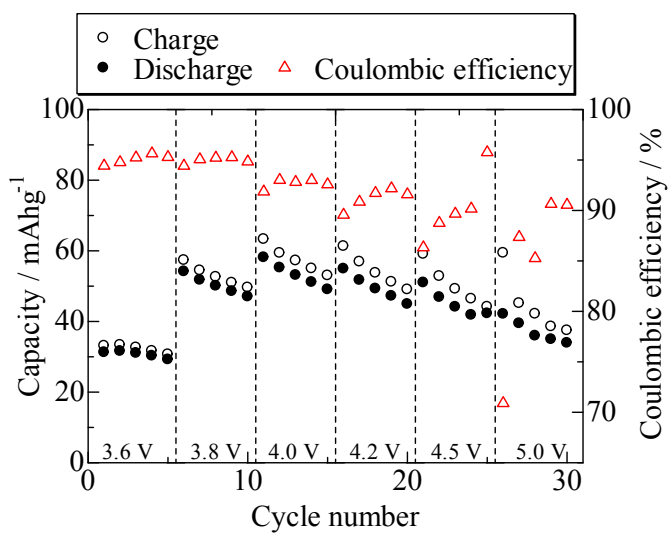

Figure S2. Figure. Cycle characteristics for the Li/LLZrTaO/(LFP+C) cell at various cutoff voltage (0.05 C rate).

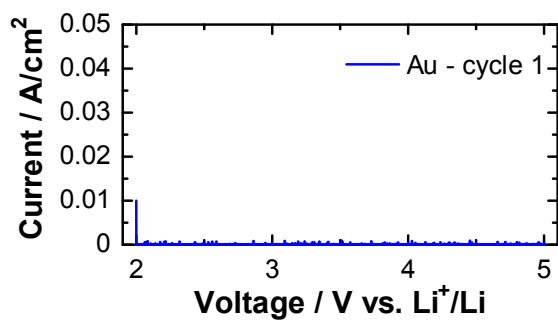

Figure S3. Cyclic voltammogram of a Li/LLZrTaO/Au cell.

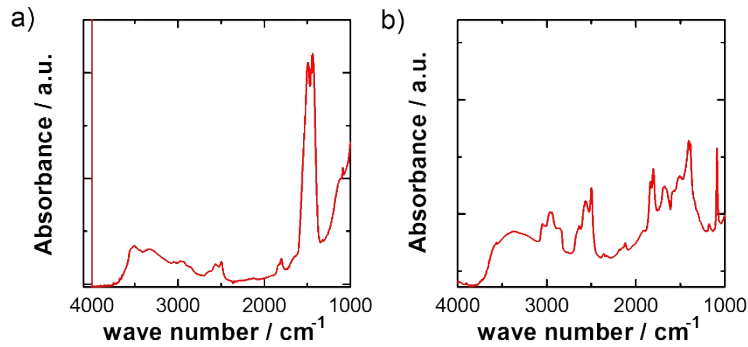

Figure S4. FTIR spectra for a) fresh LLZrTaO and b)  $\text{Li}_2\text{CO}_3$ .

Table S1. DFT-calculated decomposition potential of various non-carbon-related reactions. Thermodynamically stable constituent compounds are referred from the Materials Project database.<sup>1</sup>

| Reaction formula                                                                                                                                                                                                               | DFT-calculated decomposition potential (V) |
|--------------------------------------------------------------------------------------------------------------------------------------------------------------------------------------------------------------------------------|--------------------------------------------|
| $4 \text{Li}_{6.5}\text{La}_3\text{Zr}_{1.5}\text{Ta}_{0.5}\text{O}_{12} = 0.50 \text{Li}_2\text{O}_2 + 3 \text{Li}_6\text{Zr}_2\text{O}_7 + 2 \text{Li}_3\text{TaO}_4 + 6 \text{La}_2\text{O}_3 + \text{Li}$                  | 3.90                                       |
| $\text{Li}_{6.5}\text{La}_3\text{Zr}_{1.5}\text{Ta}_{0.5}\text{O}_{12} = 0.5 \text{Li}_2\text{O}_2 + 0.75 \text{Li}_6\text{Zr}_2\text{O}_7 + 0.5 \text{La}_3\text{TaO}_7 + 0.75 \text{La}_2\text{O}_3 + \text{Li}$             | 3.21                                       |
| $0.308 \text{Li}_{6.5}\text{La}_3\text{Zr}_{1.5}\text{Ta}_{0.5}\text{O}_{12} = 0.5 \text{Li}_2\text{O}_2 + 0.231 \text{La}_2\text{Zr}_2\text{O}_7 + 0.154 \text{La}_3\text{TaO}_7 + \text{Li}$                                 | 3.05                                       |
| $0.4 \text{Li}_{6.5}\text{La}_3\text{Zr}_{1.5}\text{Ta}_{0.5}\text{O}_{12} = 0.5 \text{Li}_2\text{O}_2 + 0.3 \text{La}_2\text{Zr}_2\text{O}_7 + 0.2 \text{Li}_3\text{TaO}_4 + 0.3 \text{La}_2\text{O}_3 + \text{Li}$           | 3.05                                       |
| $0.5 \text{Li}_{6.5}\text{La}_3\text{Zr}_{1.5}\text{Ta}_{0.5}\text{O}_{12} = 0.5 \text{Li}_2\text{O}_2 + 0.375 \text{La}_2\text{Zr}_2\text{O}_7 + 0.25 \text{Li}_5\text{TaO}_5 + 0.375 \text{La}_2\text{O}_3 + \text{Li}$      | 3.08                                       |
| $1.091 \text{Li}_{6.5}\text{La}_3\text{Zr}_{1.5}\text{Ta}_{0.5}\text{O}_{12} = 0.50 \text{Li}_2\text{O}_2 + 0.818 \text{Li}_6\text{Zr}_2\text{O}_7 + 0.182 \text{LiTa}_3\text{O}_8 + 1.636 \text{La}_2\text{O}_3 + \text{Li}$  | 3.96                                       |
| $1.333 \text{Li}_{6.5}\text{La}_3\text{Zr}_{1.5}\text{Ta}_{0.5}\text{O}_{12} = 0.5 \text{Li}_2\text{O}_2 + 1.0 \text{Li}_6\text{Zr}_2\text{O}_7 + 0.667 \text{LiTaO}_3 + 2 \text{La}_2\text{O}_3 + \text{Li}$                  | 3.73                                       |
| $0.316 \text{Li}_{6.5}\text{La}_3\text{Zr}_{1.5}\text{Ta}_{0.5}\text{O}_{12} = 0.5 \text{Li}_2\text{O}_2 + 0.237 \text{La}_2\text{Zr}_2\text{O}_7 + 0.053 \text{LiTa}_3\text{O}_8 + 0.237 \text{La}_2\text{O}_3 + \text{Li}$   | 3.21                                       |
| $0.333 \text{Li}_{6.5}\text{La}_3\text{Zr}_{1.5}\text{Ta}_{0.5}\text{O}_{12} = 0.5 \text{Li}_2\text{O}_2 + 0.25 \text{La}_2\text{Zr}_2\text{O}_7 + 0.167 \text{LiTaO}_3 + 0.250 \text{La}_2\text{O}_3 + \text{Li}$             | 3.10                                       |
| $\text{Li}_{6.5}\text{La}_3\text{Zr}_{1.5}\text{Ta}_{0.5}\text{O}_{12} = 0.5 \text{Li}_2\text{O}_2 + 0.75 \text{Li}_6\text{Zr}_2\text{O}_7 + 0.167 \text{LaTa}_3\text{O}_9 + 1.417 \text{La}_2\text{O}_3 + \text{Li}$          | 3.71                                       |
| $\text{Li}_{6.5}\text{La}_3\text{Zr}_{1.5}\text{Ta}_{0.5}\text{O}_{12} = 0.5 \text{Li}_2\text{O}_2 + 0.75 \text{Li}_6\text{Zr}_2\text{O}_7 + 0.071 \text{LaTa}_7\text{O}_{19} + 1.464 \text{La}_2\text{O}_3 + \text{Li}$       | 3.97                                       |
| $\text{Li}_{6.5}\text{La}_3\text{Zr}_{1.5}\text{Ta}_{0.5}\text{O}_{12} = 0.5 \text{Li}_2\text{O}_2 + 0.75 \text{Li}_6\text{Zr}_2\text{O}_7 + 0.5 \text{LaTaO}_4 + 1.25 \text{La}_2\text{O}_3 + \text{Li}$                      | 3.48                                       |
| $0.308 \text{Li}_{6.5}\text{La}_3\text{Zr}_{1.5}\text{Ta}_{0.5}\text{O}_{12} = 0.5 \text{Li}_2\text{O}_2 + 0.231 \text{La}_2\text{Zr}_2\text{O}_7 + 0.051 \text{LaTa}_3\text{O}_9 + 0.205 \text{La}_2\text{O}_3 + \text{Li}$   | 3.28                                       |
| $0.308 \text{Li}_{6.5}\text{La}_3\text{Zr}_{1.5}\text{Ta}_{0.5}\text{O}_{12} = 0.5 \text{Li}_2\text{O}_2 + 0.231 \text{La}_2\text{Zr}_2\text{O}_7 + 0.022 \text{LaTa}_7\text{O}_{19} + 0.22 \text{La}_2\text{O}_3 + \text{Li}$ | 3.24                                       |
| $0.308 \text{Li}_{6.5}\text{La}_3\text{Zr}_{1.5}\text{Ta}_{0.5}\text{O}_{12} = 0.5 \text{Li}_2\text{O}_2 + 0.231 \text{La}_2\text{Zr}_2\text{O}_7 + 0.154 \text{LaTaO}_4 + 0.154 \text{La}_2\text{O}_3 + \text{Li}$            | 3.13                                       |
| $2 \text{Li}_7\text{La}_3\text{Zr}_2\text{O}_{12} = 0.5 \text{Li}_2\text{O}_2 + 2 \text{Li}_6\text{Zr}_2\text{O}_7 + 3 \text{La}_2\text{O}_3 + \text{Li}$                                                                      | 3.59                                       |

Reference:

1 A. Jain, S. P. Ong, G. Hautier, W. Chen, W. D. Richards, S. Dacek, S. Cholia, D. Gunter, D. Skinner, G. Ceder and K. A. Persson, *APL Materials*, 2013, **1**, 011002.
